# Supplementary material for: Synthesis and DFT study of NH2-MOF235(Fe)-derived ZnFe2O4–Fe2O3–ZnO multiple heterojunction nanocomposites for triethylamine gas detection
Source: Royal Society of Chemistry journal article supplement (doi:10.1039/d4ta07093c), 2025-01-01
Supplement: d4ta07093c2.pdf [file d4ta07093c2.pdf]

1  
2  
3  
4  
5  
6  
7  
8  
9  
10  
11  
12  
13  
14  
15  
16  
17  
18  
19  
20  
21  
22  
23  
24  
25  
26

## Supplementary Information

### **Synthesis and DFT Study of NH<sub>2</sub>-MOF235(Fe)-Derived ZnFe<sub>2</sub>O<sub>4</sub>-Fe<sub>2</sub>O<sub>3</sub>- ZnO Multiple Heterojunction Nanocomposites for Triethylamine Gas Detection**

Hang Zhu<sup>1,2,3</sup>, Panpan Li<sup>1</sup>, Chengfeng Li<sup>1</sup>, Xuanwei Zhao<sup>1</sup>, Fanghao Lu<sup>4</sup>, Haoyang Sun<sup>1</sup>, Tianye Yang<sup>\*1,2,3</sup>, and Yubin Lan<sup>1,5</sup>

1. National Key Laboratory of Automotive Chassis Integration and Bionics/ School of Mechanical and Aerospace Engineering, Jilin University, Changchun, 130022, People's Republic of China

2. Key Laboratory of CNC Equipment Reliability, Ministry of Education, Jilin University, Changchun, 130022, People's Republic of China

3. Chongqing Research Institute, Jilin University, Chongqing, 400000, China

4. School of Advanced Technology, Xi'an Jiaotong-Liverpool University, Su Zhou, 215123, China

5. School of Agricultural Engineering and Food Science, Shandong University of Technology, Zibo, 255000, China

\*Corresponding authors. *E-mail* address: [yangty@jlu.edu.cn](mailto:yangty@jlu.edu.cn)

## 27 1. Material information

28 All the chemical reagents used in the experiments were purchased and used directly without further purification.  
29 Dimethylformamide (DMF, ACS reagent,  $\geq 99.8\%$ ) and zinc nitrate hexahydrate ( $\text{Zn}(\text{NO}_3)_2 \cdot 6\text{H}_2\text{O}$ , reagent grade,  
30  $98\%$ ) were purchased from Sigma Aldrich (Shanghai) Trading Co. Ferric chloride hexahydrate ( $\text{FeCl}_3 \cdot 6\text{H}_2\text{O}$ , AR,  $99\%$ ),  
31 2-aminoterephthalic acid ( $\text{NH}_2\text{-BDC}$ ,  $> 98\%$ ), terephthalic acid (PTA,  $99\%$ ), polyvinylpyrrolidone (PVP, average  
32 Mw 58000, K29-32), dimethyl sulfoxide (DMSO,  $> 98\%$ ), and methanol (spectroscopic grade  $\geq 99.9\%$ ) were  
33 purchased from Shanghai Aladdin Ltd. Deionized water (resistivity  $18.2 \text{ M}\Omega \cdot \text{cm}$ ) was used in all experiment.

34 All the chemicals used for preparing gases in the subsequent gas sensitivity tests were purchased directly and  
35 used without further purification. Formaldehyde (AR, wt%  $37.0\% \sim 40.0\%$ ) was purchased from Liaoning Quanrui  
36 Reagent Co., Ltd. Ethanol (AR, wt%  $\geq 99.7\%$ ) was purchased from Tianjin Fuyu Fine Chemical Co., Ltd. Acetone (AR,  
37  $\geq 99.5\%$ ) and aniline (AR, wt%  $\geq 99.5\%$ ) were purchased from Tianjin Yongsheng Fine Chemical Co., Ltd.  
38 Triethylamine (AR,  $\geq 99.0\%$ ) was purchased from Shanghai Aladdin Co., Ltd. Trimethylamine (AR, 30 wt% in  $\text{H}_2\text{O}$ )  
39 was purchased from Shanghai McLean Biochemical Science and Technology Co., Ltd. Ammonia (AR, wt%  $25 \sim 28\%$ )  
40 was purchased from Beijing Chemical Industry Factory.

## 41 2. Heterojunction sample synthesis experiment

### 42 2.1 Synthesis experiment of $\text{NH}_2\text{-MOF235}(\text{Fe})$

43 Firstly, 50 mL conical flasks were taken out and labeled as A and B. In flask A, 0.55 mmol of ferric chloride  
44 hexahydrate and 0.85 mmol of 2-aminoterephthalic acid were dissolved in 15 mL of DMF solution and stirred for  
45 15 minutes. Flask B contained 15 mL of ethanol. After stirring flask A for 15 minutes, the solution from flask A was  
46 added dropwise to flask B, and stirring was continued for another 15 minutes. These steps were repeated six times.  
47 The six solutions were then transferred into 50 mL PTFE liners and placed in a reactor at  $85^\circ\text{C}$  for 12 hours. After  
48 the reaction, the samples were allowed to cool naturally to room temperature. The precipitates were collected  
49 and washed three times with deionized water and anhydrous ethanol, respectively. Finally, the samples were dried  
50 in a constant temperature oven at  $60^\circ\text{C}$  for 10 hours, resulting in the synthesis of the Fe-MOF precursor for further  
51 preparation.

## 52 2.2 Synthesis of $\text{ZnFe}_2\text{O}_4\text{-Fe}_2\text{O}_3\text{-ZnO}$ multi-heterojunction nanocomposites

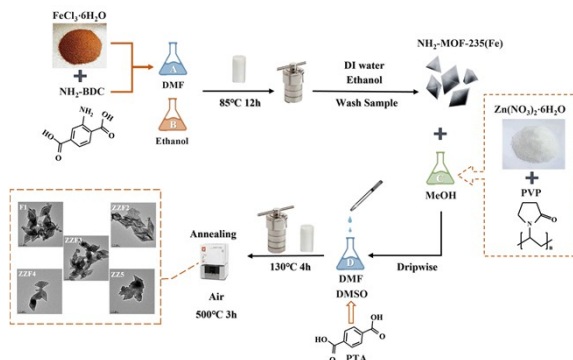

**Fig. S1** Schematic of the experimental synthesis of  $\text{NH}_2\text{-MOF235(Fe)@MOF5}$  MOF-on-MOF derived multiple heterojunction nanocomposites.

53 0.1g of Fe-MOF precursor, prepared from the above experiments, was dispersed in 10 mL of methanol solution  
54 in a conical flask labeled C. The mass of  $\text{Zn(NO}_3)_2$  added was 0.05, 0.16, 0.25, 0.72, and 1.08 g. The samples were  
55 labeled as samples numbered F1, ZZ2, ZZ3, ZZ4, and ZZ5, respectively. To each samples No. F1-ZZ5, 0.1 g of PVP  
56 was added and stirred for 15 minutes. Subsequently, five portions of 3.3 mmol of PTA were dissolved in a mixture  
57 of 20 mL of DMF and 10 mL of DMSO in a conical flask labeled D and stirred for 15 minutes to obtain five portions  
58 of the PTA solution. At the end of stirring, the PTA solution was added dropwise to the F1-ZZ5 sample solution,  
59 stirred for 15 min and then kept at room temperature for 45 minutes. Subsequently, the F1-ZZ5 sample solutions  
60 were then transferred into 50 mL of PTFE liners and placed in a reactor at  $130^\circ\text{C}$  for 4 hours. After the reaction, the  
61 samples were cooled naturally to room temperature, the precipitates were collected and washed three times by  
62 centrifugation in deionized water and anhydrous ethanol, respectively. After washing, the samples were dried in a  
63 constant temperature drying oven. Finally, the products were annealed in a muffle furnace at  $500^\circ\text{C}$  for 3 h to  
64 obtain samples F1-ZZ5. The experimental synthesis schematic is shown in Fig. S1, thus completing the synthesis of  
65  $\text{NH}_2\text{-MOF235(Fe)@MOF5}$  MOF-on-MOF derived  $\text{ZnFe}_2\text{O}_4\text{-Fe}_2\text{O}_3\text{-ZnO}$  ternary heterojunction nanocomposites.

## 66 3. Fabrication of sensors

67 The sensor consists of a heterojunction material with a ceramic substrate, schematically shown in Fig. S2. The  
68 ceramic substrate has a total size of about  $1.5 \times 1.5$  mm and is made of sintered alumina. The surface of the  
69 measuring electrode is plated with gold to increase conductivity. Firstly, an appropriate amount of powdered  
70 sample was added the mortar and pestle, assisted by the addition of an appropriate amount of deionized water to  
71 form a paste. Pt conductors were soldered to the substrate, and the material was coated onto the inter-finger  
72 electrode on the surface of the ceramic substrate.

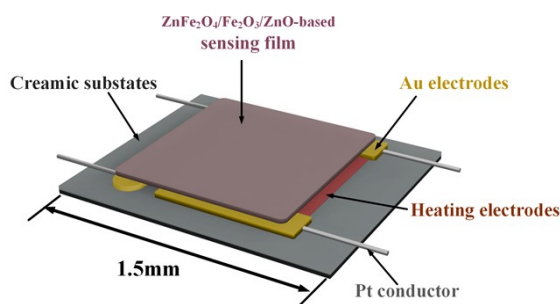

**Fig. S2** Schematic diagram of ceramic substrate sensor for gas sensitive test.

73 **4. Material characterization apparatus**

74 XRD data acquisition and material composition analysis of the heterogeneous junction sensing materials was  
75 performed using a SHIMADZU LabX XRD-6100 X-ray diffractometer (XRD) with  $\text{CuK}\alpha$  radiation ( $\lambda = 0.154 \text{ nm}$ ).  
76 Raman spectra of the samples were obtained using a Horiba LabRAM HR Evolution instrument to observe the  
77 intermolecular vibrations and provide information on the phases and structures of the samples. The micro-scale  
78 morphology and structure of the materials, as well as the distribution of elements, were characterized by TESCAN  
79 VEGA4 tungsten filament scanning electron microscopy (SEM) and EDS surface scanning. The nanoscale  
80 morphology of the samples was observed using a FEI Tecnai F20 transmission electron microscope (TEM) to obtain  
81 both TEM and high-resolution transmission electron micrographs (HRTEM). X-ray Photoelectron Spectroscopy  
82 (XPS) were obtained using an ESCALAB MKII to visualize the elemental composition and chemical states of the  
83 samples. The optical properties and defects of the samples were analyzed by UV-vis spectroscopy with a Hitachi  
84 U4150 and photoluminescence (PL) spectroscopy with an Edinburgh FLS1000.

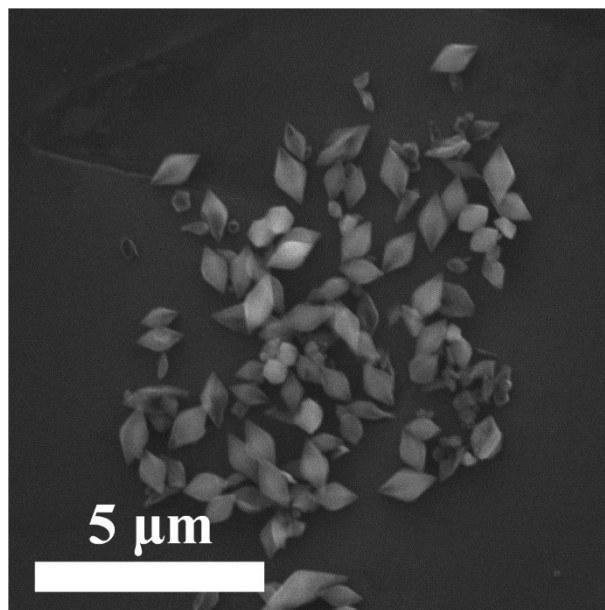

86

87 **Fig. S3** Polyhedral rhombic SEM of NH<sub>2</sub>-MOF235(Fe) without the addition of Zn compounds.88 **6. Elemental weight (Table S1) and atomic percentages (Table S2) obtained by EDS scanning Mapping****Table S1.**

Percentage of weight fraction (wt%) of EDS scanned Fe, Zn, O elements in each sample.

| Sample | F1       | ZZF2     | ZZF3     | ZZF4     | ZZ5      |
|--------|----------|----------|----------|----------|----------|
| Fe     | 69.4 wt% | 52.4 wt% | 59.3 wt% | 13.9 wt% | 9.7 wt%  |
| Zn     | 0.3 wt%  | 20.0 wt% | 12.4 wt% | 67.5 wt% | 72.6 wt% |
| O      | 30.3 wt% | 27.6 wt% | 28.3 wt% | 18.6 wt% | 17.7 wt% |

**Table S2.**

Percentage of atomic fractions (at%) of EDS scanned Fe, Zn, O elements in each sample.

| Sample | F1       | ZZF2     | ZZF3     | ZZF4     | ZZ5      |
|--------|----------|----------|----------|----------|----------|
| Fe     | 39.4 at% | 31.6 at% | 37.0 at% | 9.9 at%  | 7.2 at%  |
| Zn     | 0.0 at%  | 10.3 at% | 5.9 at%  | 40.7 at% | 46.4 at% |
| O      | 60.6 at% | 58.1 at% | 57.1 at% | 49.4 at% | 46.4 at% |

## 90 7. XPS

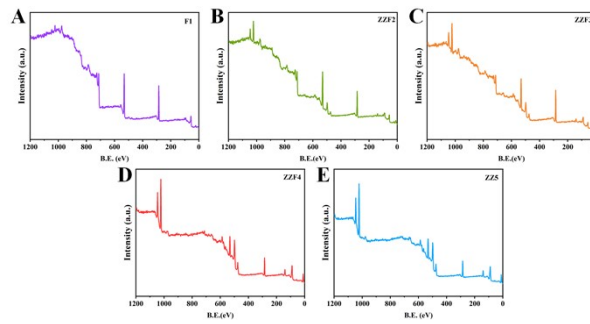

Fig. S4 XPS full test energy spectrum of the sample.

## 91 8. DFT calculation details

92 All first-principles density functional theory (DFT) calculations were conducted using the Vienna Ab-  
93 initio Simulation Package (VASP) <sup>1-3</sup>. The Perdew-Burke-Ernzerh (PBE) in the generalized gradient  
94 approximation (GGA) with the on-site Coulomb Repulsion U term was applied to describe the exchange-  
95 correlation function <sup>4,5</sup>. In this work, U(Zn)=5.0 eV and U(Fe)= 3.5 eV for all the calculations. Based on  
96 the plane wave method, the projector augmented-wave (PAW) method with an energy cutoff of 400  
97 eV was implemented for the electron-ion interactions <sup>6,7</sup>. The van der Waals interaction was taken into  
98 account using DFT-D3 method with Becke-Jonson damping dispersion correction. All structures were  
99 fully relaxed until the electronic energy and force acting on atom were smaller than 10<sup>-4</sup> eV and 0.05  
100 eV·Å<sup>-1</sup>, respectively. The Brillouin-zone sampling was conducted using Monkhorst-Pack (MP) grids of  
101 special points with the separation of 0.04 Å<sup>-1</sup>. A Gaussian smearing of 0.05 eV was applied to speed up  
102 self-consistent field iteration. A vacuum height of >15 Å along the vertical direction was selected to  
103 avoid the unwanted interaction between the slab and its period images. The optimized structures were  
104 illustrated with VESTA software <sup>8</sup>.

### 105 8.1 Ball-and-stick structure models

106 After the original cell models of Fe<sub>2</sub>O<sub>3</sub>, ZnO, and ZnFe<sub>2</sub>O<sub>4</sub> surface were established, the structures  
107 were optimized, and the crystal faces of different components were matched and optimized. The model  
108 of no adsorbed gas was established by matching the (001) face of Fe<sub>2</sub>O<sub>3</sub> with the (001) face of ZnO,  
109 (111) face of ZnFe<sub>2</sub>O<sub>4</sub> with the (001) face of Fe<sub>2</sub>O<sub>3</sub>, (111) face of ZnFe<sub>2</sub>O<sub>4</sub> with the (001) face of ZnO.

### 110 8.2 Details of adsorption energy calculation

111 The adsorption energy indicates the energy change of the gas molecules during the adsorption

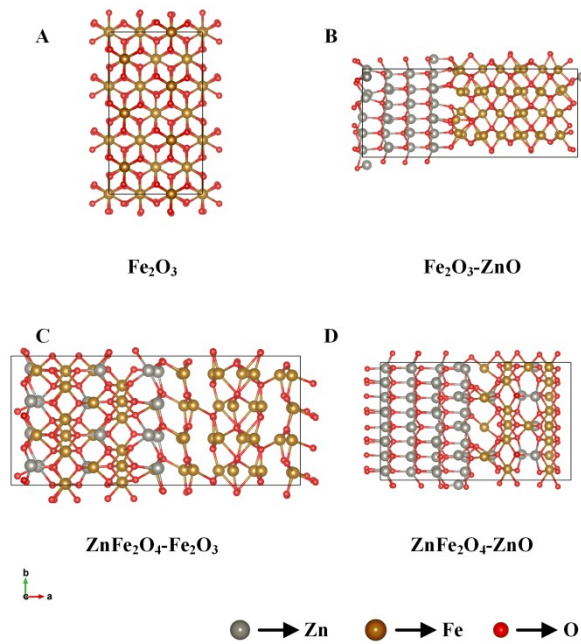

**Fig. S5.** Structural modeling of  $\text{Fe}_2\text{O}_3$  and the three types of heterojunctions molecules.

112 process, which is calculated by Equation S1<sup>9</sup>. Among them,  $E_{total}$  is the total energy of the gas molecules  
 113 after adsorption on the surface of the material,  $E_{surface}$  indicates that it is the energy of the surface of  
 114 the material, and  $E_{gas}$  indicates the energy of the gas molecules.

$$115 \quad E_{ads} = E_{total} - (E_{surface} + E_{gas}) \quad (S1)$$

### 116 9. Heterogeneous junction gas sensitization mechanism and details of EDL.

117 The gas-sensitive mechanisms are primarily attributable to the thickness-control model of the  
 118 surface depletion layer, also known as the grain-boundary barrier model.  $\text{ZnFe}_2\text{O}_4$ ,  $\text{Fe}_2\text{O}_3$ , and  $\text{ZnO}$  are  
 119 n-type semiconductors, where the main carriers are free electrons. The sensitization process and  
 120 mechanism of multiple heterojunction-based gas sensors is investigated by studying the electronic  
 121 properties of the multiple heterojunction materials in an atmospheric environment. Redox on the  
 122 sample surface involves the adsorbed oxygen negative ions reacting with TEA, releasing the trapped  
 123 electrons back into the material's conduction band. Consequently, the depletion layer is lowered, and  
 124 the return of free electrons reduces the thickness and height of the potential barriers, resulting in a  
 125 decrease in the resistance of the material. At higher temperatures, the enhancement of the sensor  
 126 material's surface activity and the consumption of adsorbed oxygen leads to the transport of oxygen  
 127 negative ions through the lattice of the material. The lattice oxygen can be directly converted into  
 128 surface oxygen vacancies by reacting with reducing gases, thereby increasing the material's reactivity.

129 Multiple heterojunctions can provide a more complex mechanism for the regulation of energy band  
130 structure, with the modulation of different ratios of Fe and Zn to form heterojunctions with altered  
131 ratios.

132

### 133 **References**

- 134 1. G. Kresse and J. Furthmüller, Efficiency of ab-initio total energy calculations for metals and  
135 semiconductors using a plane-wave basis set, *Computational Materials Science*, 1996, 6, 36.
- 136 2. G. Kresse and J. Furthmüller, Efficient iterative schemes for ab initio total-energy calculations using  
137 a plane-wave basis set, *PHYSICAL REVIEW B*, 1996, 54.
- 138 3. G. Kresse and J. Hafner, Ab.initio molecular dynamics for liquid metals, *PHYSICAL REVIEW B*, 1993,  
139 47.
- 140 4. J. P. Perdew, K. Burke and M. Ernzerhof, Generalized Gradient Approximation Made Simple,  
141 *PHYSICAL REVIEW LETTERS*, 1996, 77.
- 142 5. J. P. Perdew and Y. Wang, Accurate and simple analytic representation of the electron-gas  
143 correlation energy, *PHYSICAL REVIEW B*, 1992, 45.
- 144 6. P. E. Blöchl, Projector augmented-wave method, *PHYSICAL REVIEW B*, 1994, 50.
- 145 7. G. Kresse and D. Joubert, From ultrasoft pseudopotentials to the projector augmented-wave  
146 method, 1999, 59.
- 147 8. K. Momma and F. Izumi, VESTA 3 for three-dimensional visualization of crystal, volumetric and  
148 morphology data, *J. Appl. Crystallogr.*, 2011, 44, 1272-1276.
- 149 9. M. Y. Z. Sun, M. S. Chen, X. Y. Cui, Z. M. Zhao, J. H. Wang, L. Liang and Y. T. Zhou, Unveiling the gas  
150 sensing potential of  $C_xN_y$  monolayer through ab initio screening, *Surf. Interfaces*, 2023, 42, 8.
